# Supplementary material for: The Expression of CD90/Thy-1 in Hepatocellular Carcinoma: An In Vivo and In Vitro Study
Source: PubMed Central journal article supplement (PMC3792890; doi:10.1371/journal.pone.0076830), 2013-10-08
Supplement: pone.0076830.s001.pdf [file pone.0076830.s001.pdf]

**FILE S1. SUPPLEMENTAL DATA**

**Table S1**

| Gene       | Acc. No.   | Sequence F (5' → 3')  | Sequence R (5' → 3') | Ref. |
|------------|------------|-----------------------|----------------------|------|
| 18SRNA     | NR_003286  | TAACCCGTTGAACCCATT    | CCATCCAATCGGTAGTAGC  | [S1] |
|            |            |                       | G                    |      |
| Beta-Actin | NM_001101  | CGCCGCCAGCTCACCATG    | CACGATGGAGGGGAAGACG  | TS   |
|            |            |                       | G                    |      |
| CD90       | NM_006288  | AGAGACTTGGATGAGGAG    | CTGAGAATGCTGGAGATG   | TS   |
| CD29       | NM_002211  | GCCTTGGTGTCTGTGCTGAG  | AGTCGTCAACATCCTTCTCC | TS   |
|            |            |                       | TTAC                 |      |
| CD44       | NM_000610  | CTCATACCAGCCATCCAATG  | GAGTCCATATCCATCCTTCT | TS   |
|            |            |                       | TC                   |      |
| CD105      | NM_0011147 | CTTCCTCCTCCACTTCTAC   | GGACTTCCTGGTCTTGAG   | TS   |
|            | 53         |                       |                      |      |
| CD166      | NM_001627  | GAAGGAGGAGGAATATGGA   | GTCAAGTCGGCAAGGTATG  | TS   |
|            |            | ATC                   |                      |      |
| CD54       | NM_000201  | GCTCAAGTGTCTAAAGGATG  | TATGACTGCGGCTGCTAC   | TS   |
|            |            | G                     |                      |      |
| CD106      | NM_001078  | GACCACATCTACGCTGAC    | GCAACTGAACACTTGACTG  | TS   |
| THBS       | NM_003246  | ACCAACCGCATTCCAGAGTC  | CCGCACAGCATCCACCAG   | TS   |
| VEGF       | NM_0011716 | GTGAGGCGGCGGTGTG      | GCAAGGCAAGGCTCCAATG  | TS   |
|            | 30         |                       |                      |      |
| FAP        | NM_004460  | TATTCAGAGTAACACAGGAT  | ACTTCTTGCTTGGAGGATAG | TS   |
|            |            | TCA                   |                      |      |
| FSP1       | NM_019554  | CTTCTTCTTCTTGGTTTGGT  | AGCAGTCAGGATCAACAC   | TS   |
| ACTA2      | NM_0011419 | TTGGCTTGGCTTGTGAGG    | GCTTTAGGGTCGCTGGAG   | TS   |
|            | 45         |                       |                      |      |
| TGFB1      | NM_000660  | GCAACAATTCCTGGCGATAC  | CTCCACGGCTCAACCACTG  | TS   |
|            |            | C                     |                      |      |
| IGF1       | NM_0011112 | TCTGAATCTTGGCTGCTGGAG | GGTGTGCTTCTTGACGACTT | TS   |
|            | 84         |                       | G                    |      |
| IGF2       | NM_000612  | CGCTGCTACCGCCATCTC    | GTCCCTCTGACTGCTCTGTG | TS   |
| HGF        | NM_0010109 | AAGGTCAAGGAGAAGGCTAC  | TGCTCGTGAGGATACTGAG  | TS   |
|            | 32         | AG                    | AATC                 |      |

|       |                    |                               |                                  |      |
|-------|--------------------|-------------------------------|----------------------------------|------|
| CTGF  | NM_001901          | AGACCTGTGCCTGCCATTAC          | TGTGAATCAGTTCAAGTTCC<br>AGTC     | TS   |
| ABCG2 | NM_004827          | TATAGCTCAGATCATTGTCAC<br>AGTC | GTTGGTCGTCAGGAAGAAG<br>AG        | TS   |
| ABCC1 | NM_004996          | GCCAAGAAGGAGGAGACC            | AGGAAGATGCTGAGGAAGG              | TS   |
| ABCB1 | NM_000927          | TGCTCAGACAGGATGTGAGT<br>TG    | AATTACAGCAAGCCTGGAA<br>CC        | TS   |
| EpCAM | NM_002354.<br>1    | GAATAATAATCGTCAATGCC<br>AGTG  | CGCTCTCATCGCAGTCAG               | TS   |
| VIM   | NM_003380.<br>3    | AACTTCTCAGCATCACGATG<br>AC    | TTGTAGGAGTGTGCGTTGTT<br>AAG      | TS   |
| CD133 | NM_006017          | CATCTGCTCTCTGCTGAC            | AACTTAATCCAACTCCAAC<br>C         | TS   |
| OCT4  | NM_0011595<br>42.1 | AGCAAAACCCGGAGGAGT            | CCACATCGGCCTGTGTATAT<br>C        | [S2] |
| SOX2  | NM_003106.<br>3    | TATTTGAATCAGTCTGCCGAG         | ATGTACCTGTTATAAGGAT<br>GATATTAGT | [S2] |
| NANOG | NM_024865.<br>2    | ATGCCTCACACGGAGACTGT          | AGGGCTGTCCTGAATAAGC<br>A         | [S2] |
| CDH1  | NM_004360.<br>3    | GGAACTATGAAAAGTGGGCT<br>TG    | AAATTGCCAGGCTCAATGA<br>C         | [S2] |
| CDH2  | NM_001792.<br>3    | GACGGTTCGCCATCCAGAC           | TCGATTGGTTTGACCACGG              | [S3] |
| SNAI1 | NM_005985.<br>3    | CTTCGGCTCCAGGAGAGTC           | TTCCCACTGTCCTCATCTGA<br>C        | [S2] |
| SNAI2 | NM_003068.<br>4    | TGGTTGCTTCAAGGACACAT          | GTTGCAGTGAGGGCAAGAA              | [S2] |

---

**Table S2**

| Antibody                     | Clone                                                             | MW kDa    |
|------------------------------|-------------------------------------------------------------------|-----------|
| CD90/Thy-1                   | 5E10 (Stem Cell Technologies, VA, Canada)                         | 25 – 35   |
| ABCG2/BCRP                   | BXP53 (Abcam, Cambridge, MA, USA)                                 | 72        |
| ABCB1/MDR1                   | C219 (Abcam, Cambridge, MA, USA)                                  | 170 – 190 |
| ACBC1/MRP1                   | A23 (Enzo Life Sciences, Lausanne,<br>Switzerland)                | 140       |
| CD133/Prominin 1             | AC133 (Miltenyi Biotec GmbH, Bergisch<br>Gladbach, Germany)       | 117       |
| CD44                         | F10-44-2 (Abcam, Cambridge, MA, USA)                              | 100-250   |
| $\alpha$ smooth muscle actin | 1A4 (Dako, Glostrup, Denmark)                                     | 42        |
| Vimentin                     | VI-RE/1 (Abcam, Cambridge, MA, USA)                               | 57        |
| actin                        | A2066 (Sigma, St. Louis, MO, USA)                                 | 42        |
| ATP1A1                       | 464.6 (Abcam, Cambridge, MA, USA)                                 | 112       |
| Anti rabbit IgG peroxidase   | P0448 (Dako, Glostrup, Denmark)                                   |           |
| Anti rat IgG peroxidase      | P0450 (Dako, Glostrup, Denmark)                                   |           |
| Anti mouse IgG peroxidase    | P0260 (Dako, Glostrup, Denmark)                                   |           |
| Anti mouse IgG FITC          | 715-096-150 (Jackson ImmunoResearch Lab.,<br>West Grove, PA, USA) |           |

**Figure S1**

**A**

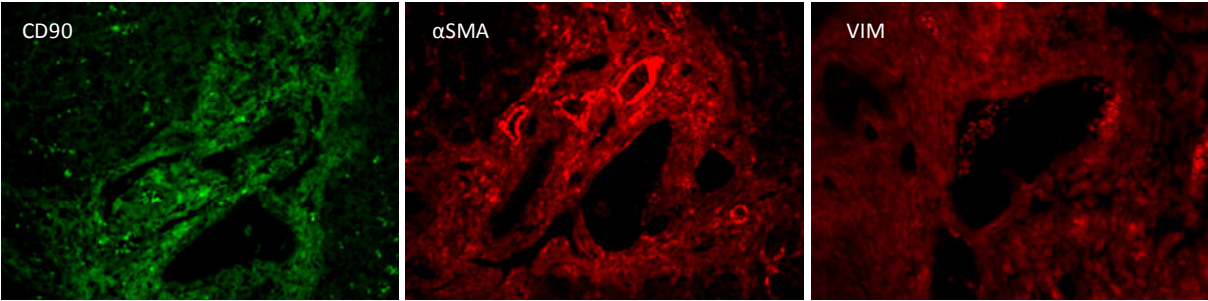

**B**

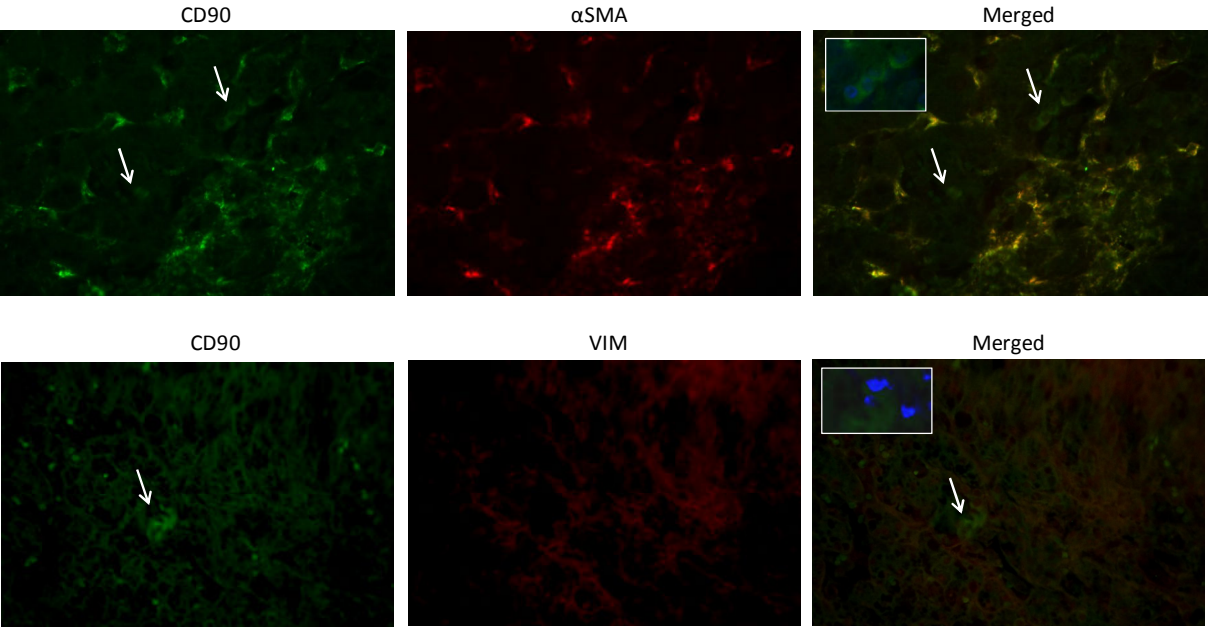

**Figure S2**

**A**

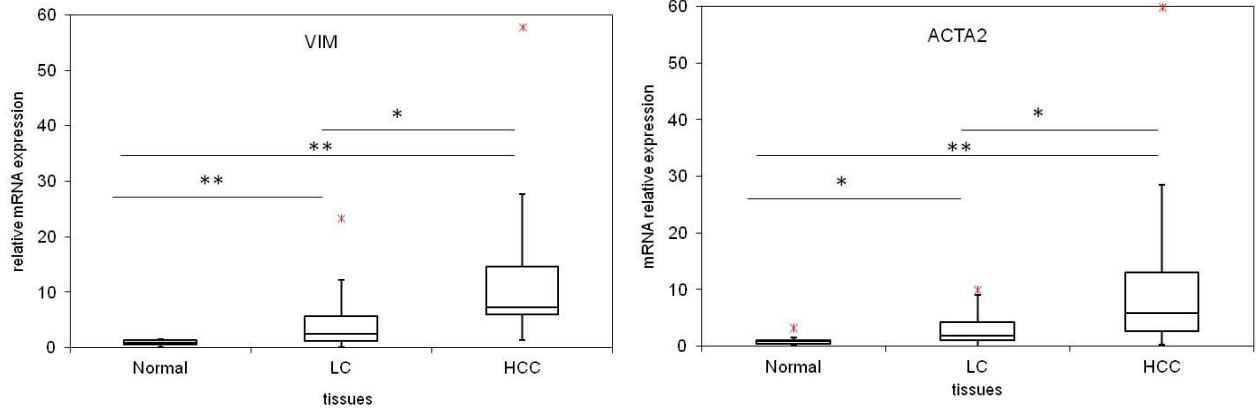

**B**

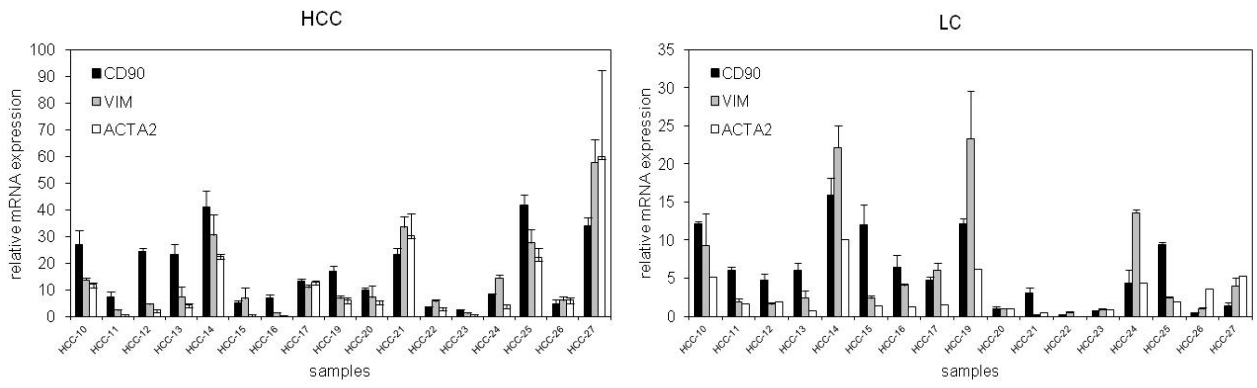

**Figure S3**

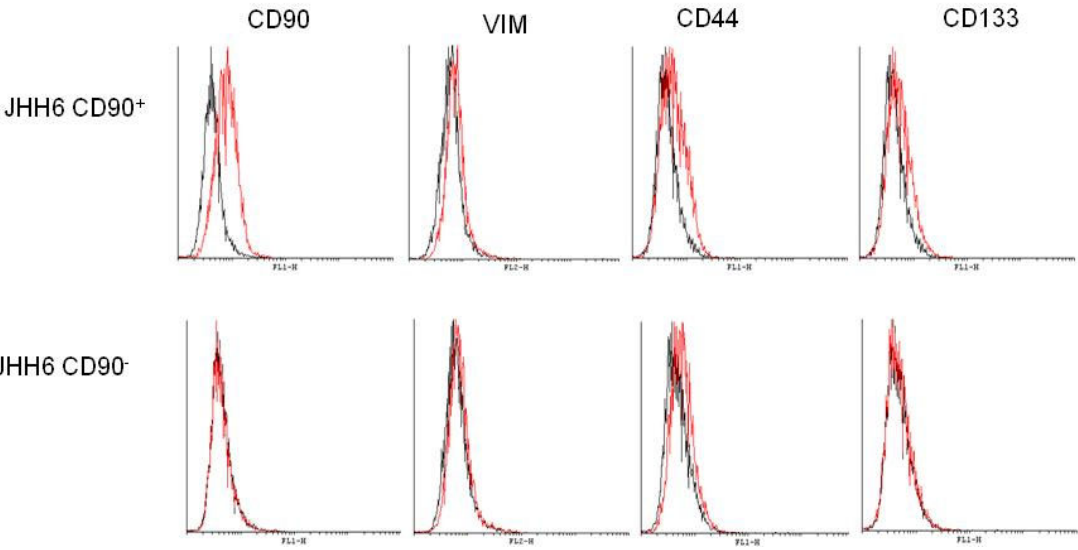

Figure S4

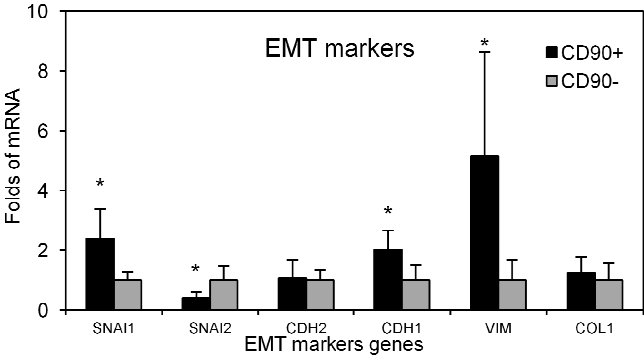

Figure S5

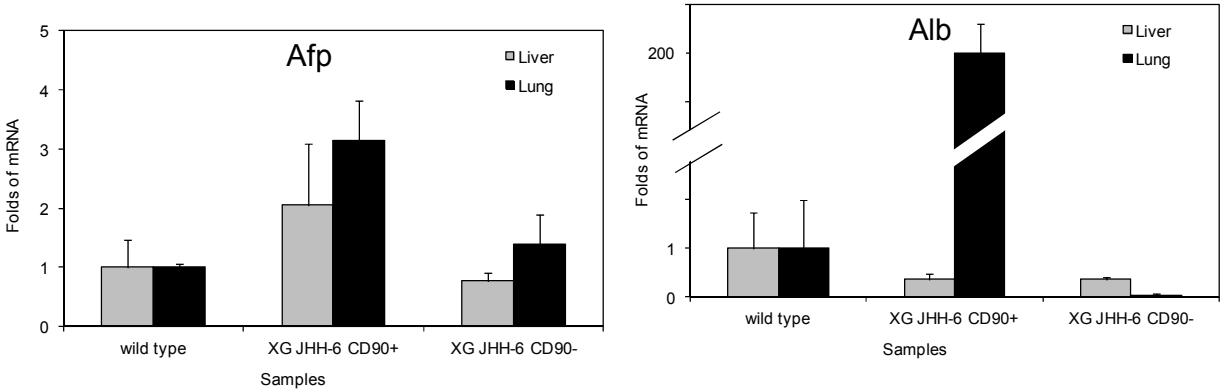



### Reference List of File S1

- S1. Schmittgen TD, Zakrajsek BA (2000) Effect of experimental treatment on housekeeping gene expression: validation by real-time, quantitative RT-PCR. *J Biochem Biophys Methods* 46: 69-81.
- S2. Lin CW, Liao MY, Lin WW, Wang YP, Lu TY, et al. (2012) Epithelial Cell Adhesion Molecule Regulates Tumor Initiation and Tumorigenesis via Activating Reprogramming Factors and Epithelial-Mesenchymal Transition Gene Expression in Colon Cancer. *J Biol Chem* 287: 39449-39459.
- S3. Kroepil F, Fluegen G, Totikov Z, Baldus SE, Vay C, et al. (2012) Down-regulation of CDH1 is associated with expression of SNAI1 in colorectal adenomas. *PLoS One* 7: e46665
